# Supplementary material
Source: publisher figshare collection journal article supplement (https://acs.figshare.com/ndownloader/files/3625218)
Supplement: Supplementary file 1 [file 3625218]

## Supporting Information

1. GC×GC chromatograms
2. GC×GC-TOFMS of select compounds

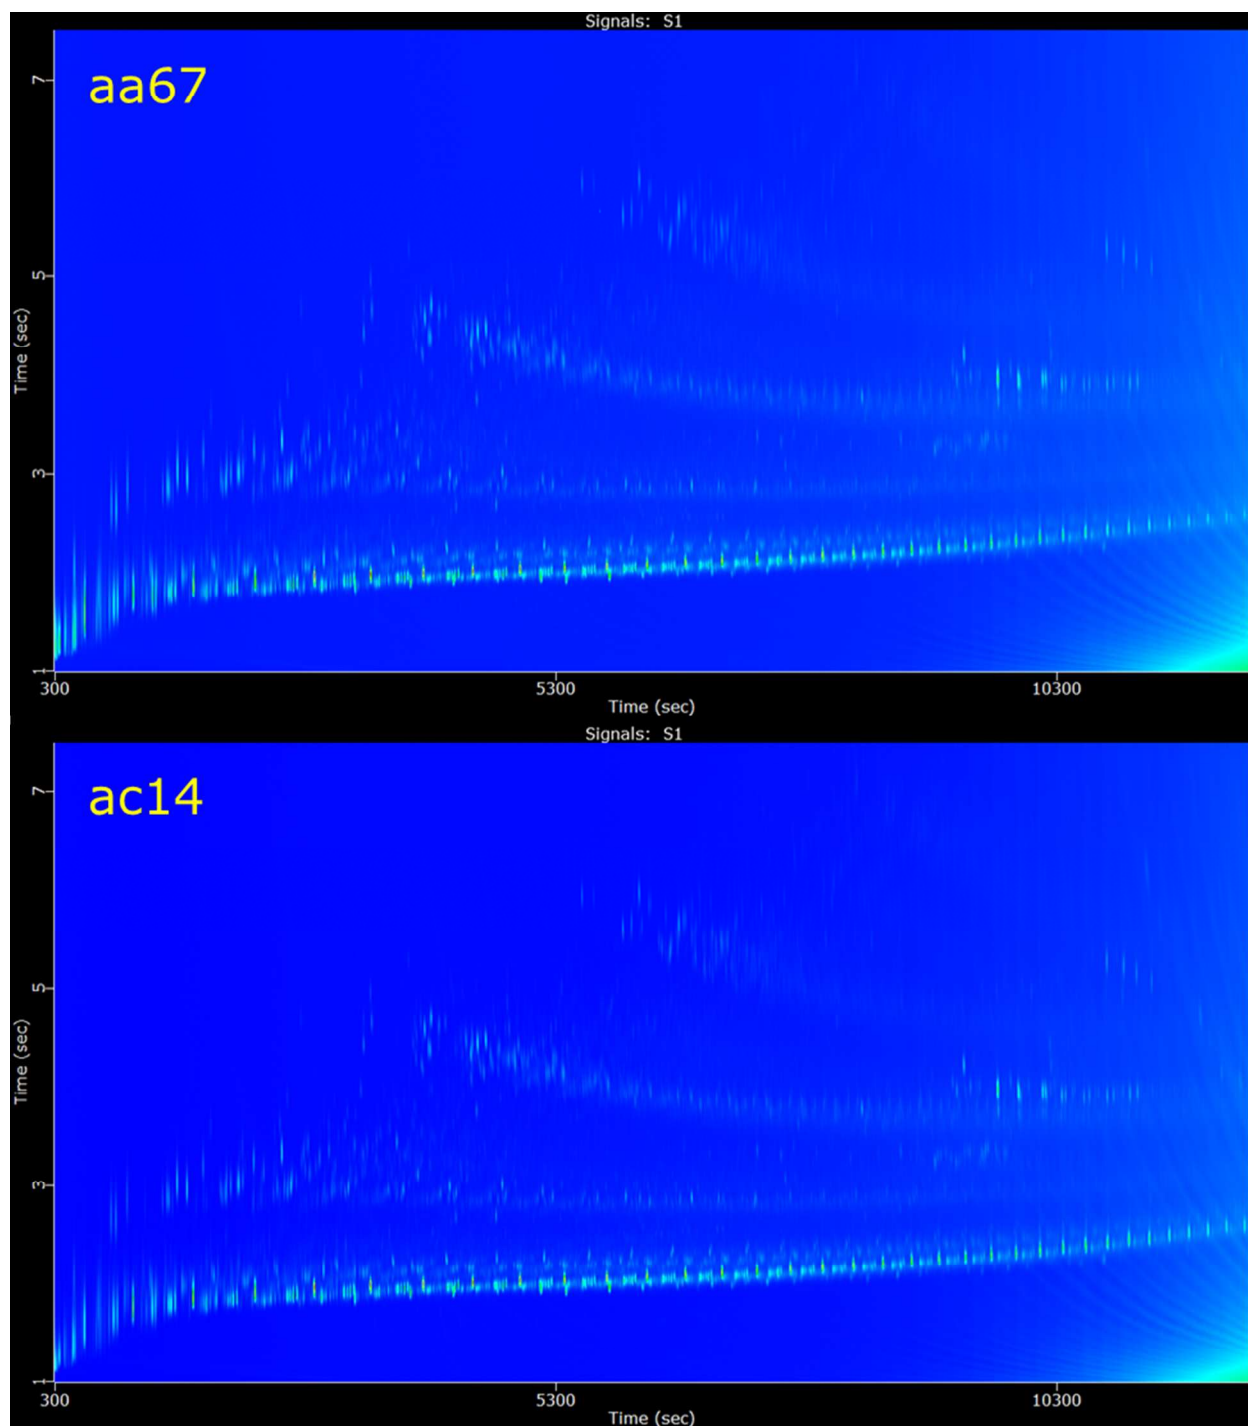



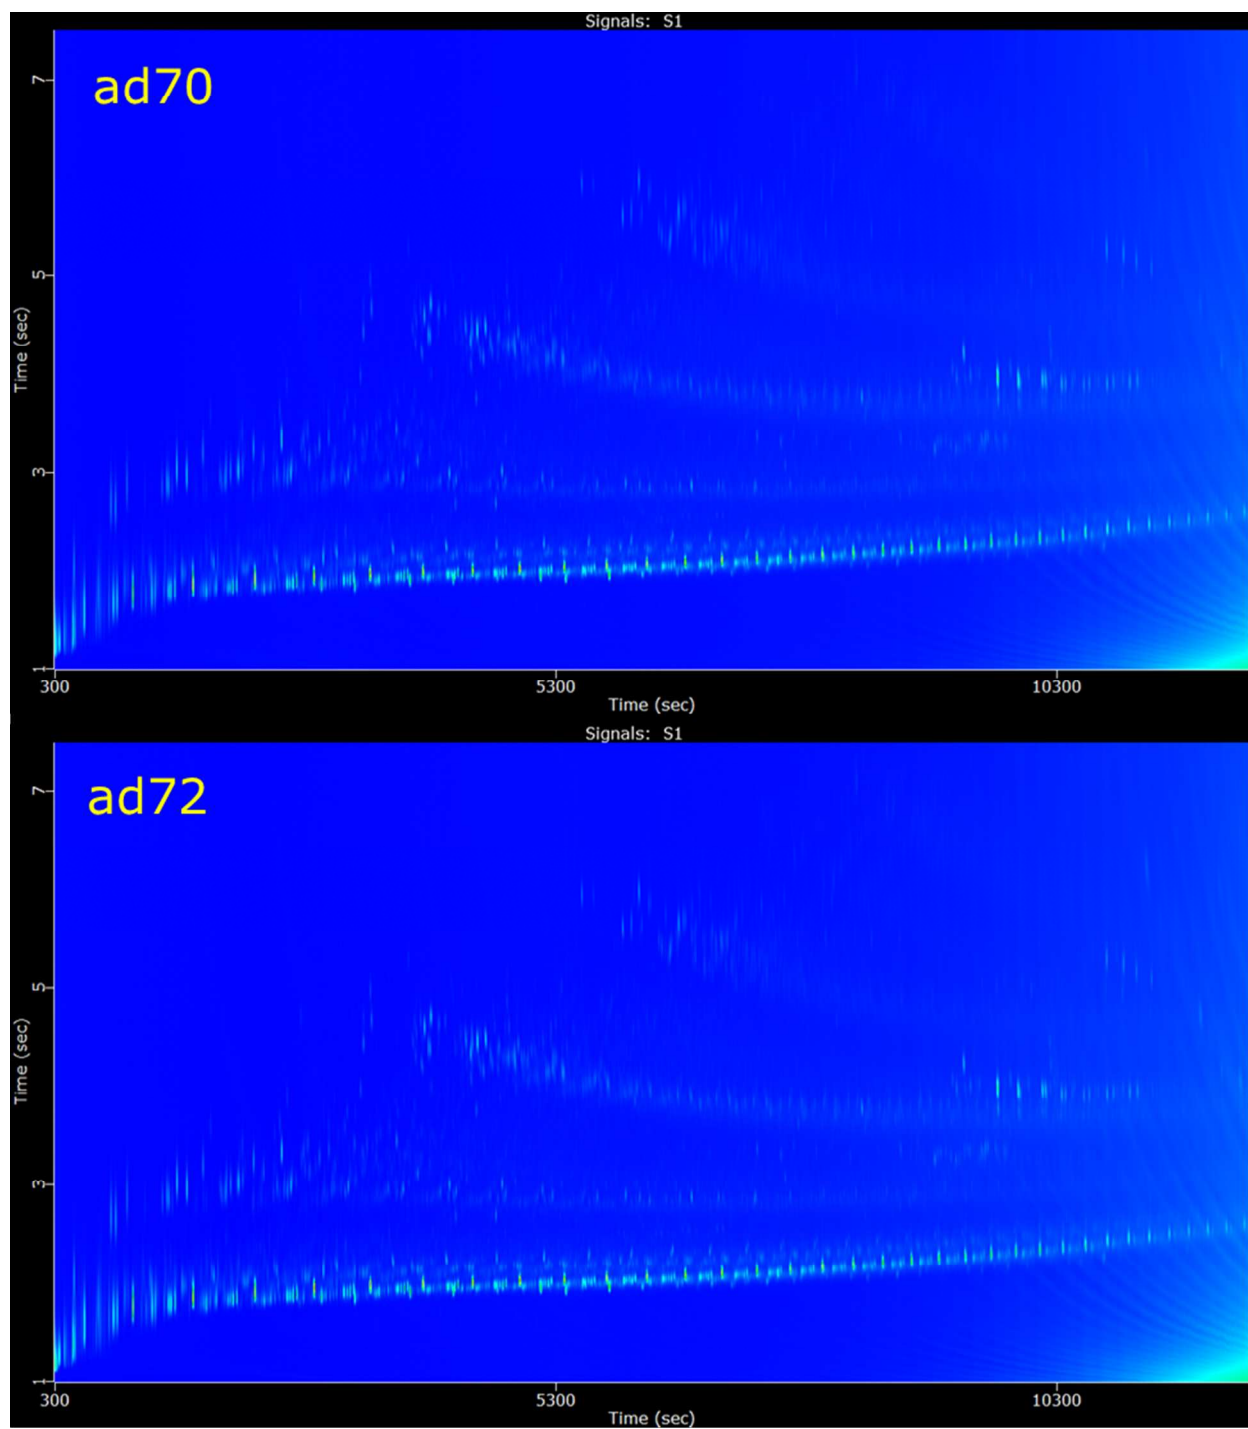

**Figure S1.** GC×GC chromatograms of all six samples from the reservoir, ordered with increasing depth in the reservoir, expressed as TVDss in feet.

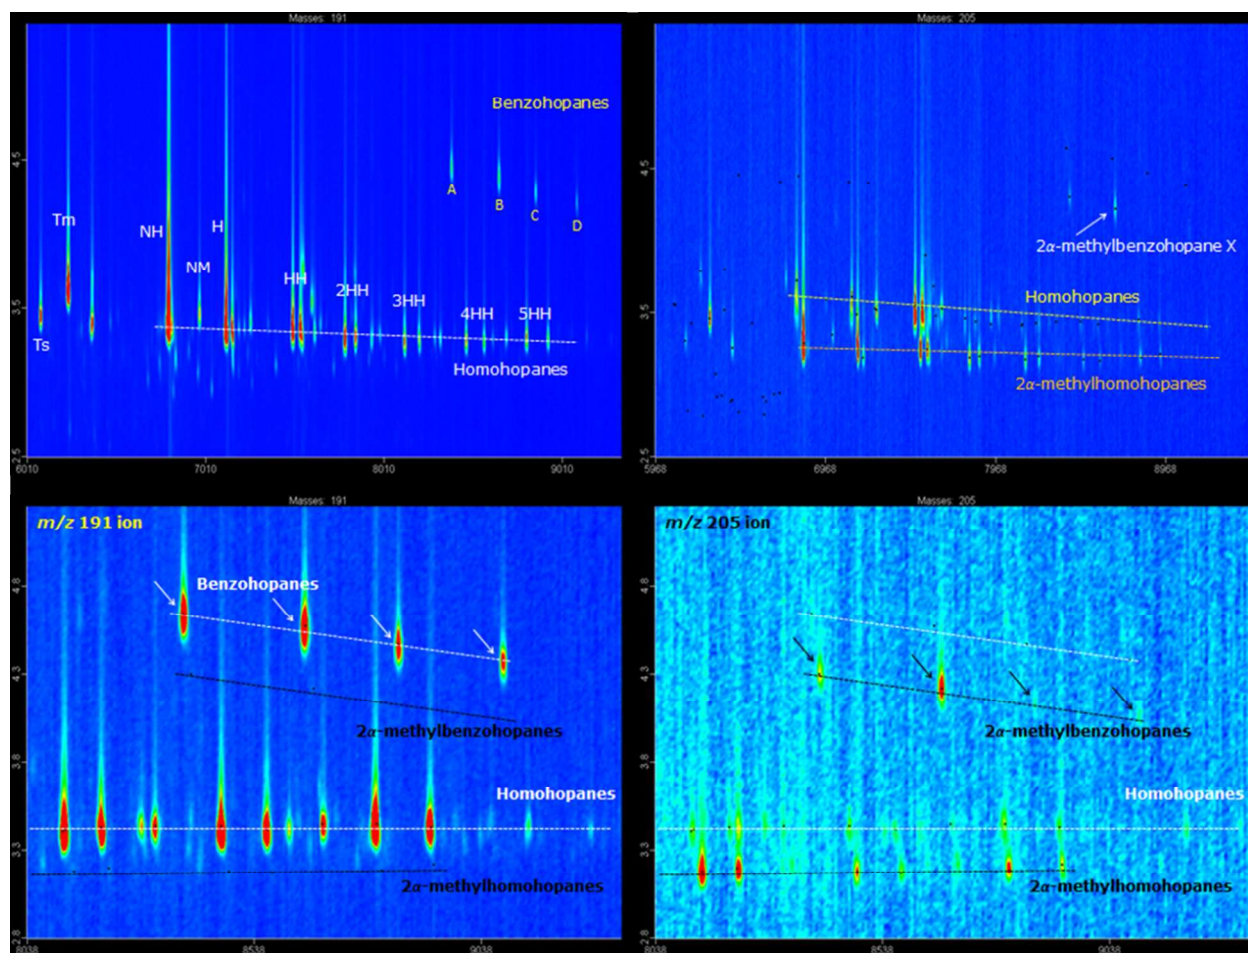

**Figure S2.** GC $\times$ GC-FID and GC $\times$ GC-TOFMS chromatograms of biomarker region showing presence of benzohopanes and 2 $\alpha$ -methylbenzohopanes, as identified with  $m/z$  191 and 205 ion. MS data is available in Figure S3.

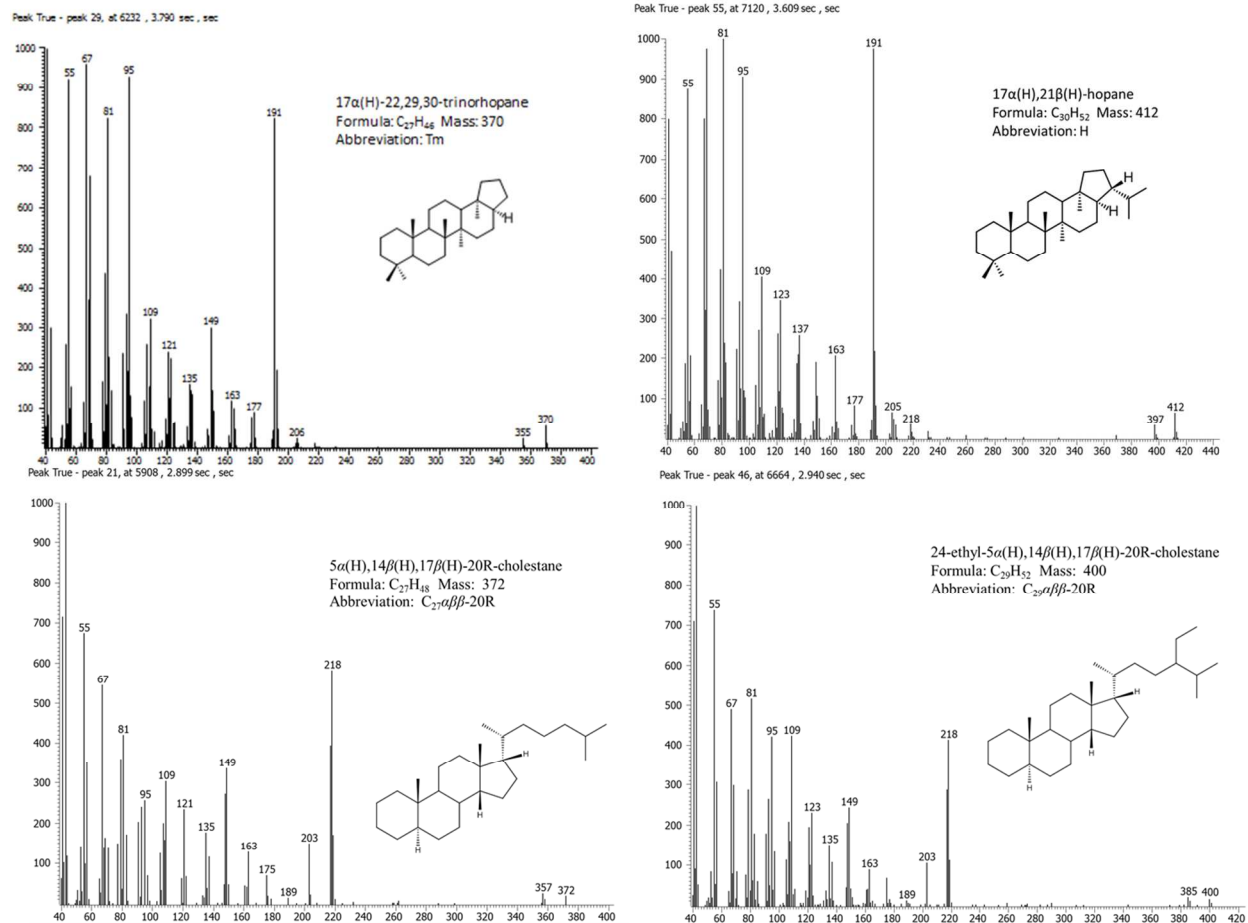

**Figure S3.** Selected GC $\times$ GC-TOFMS chromatograms used to identify compounds in the biomarker region.

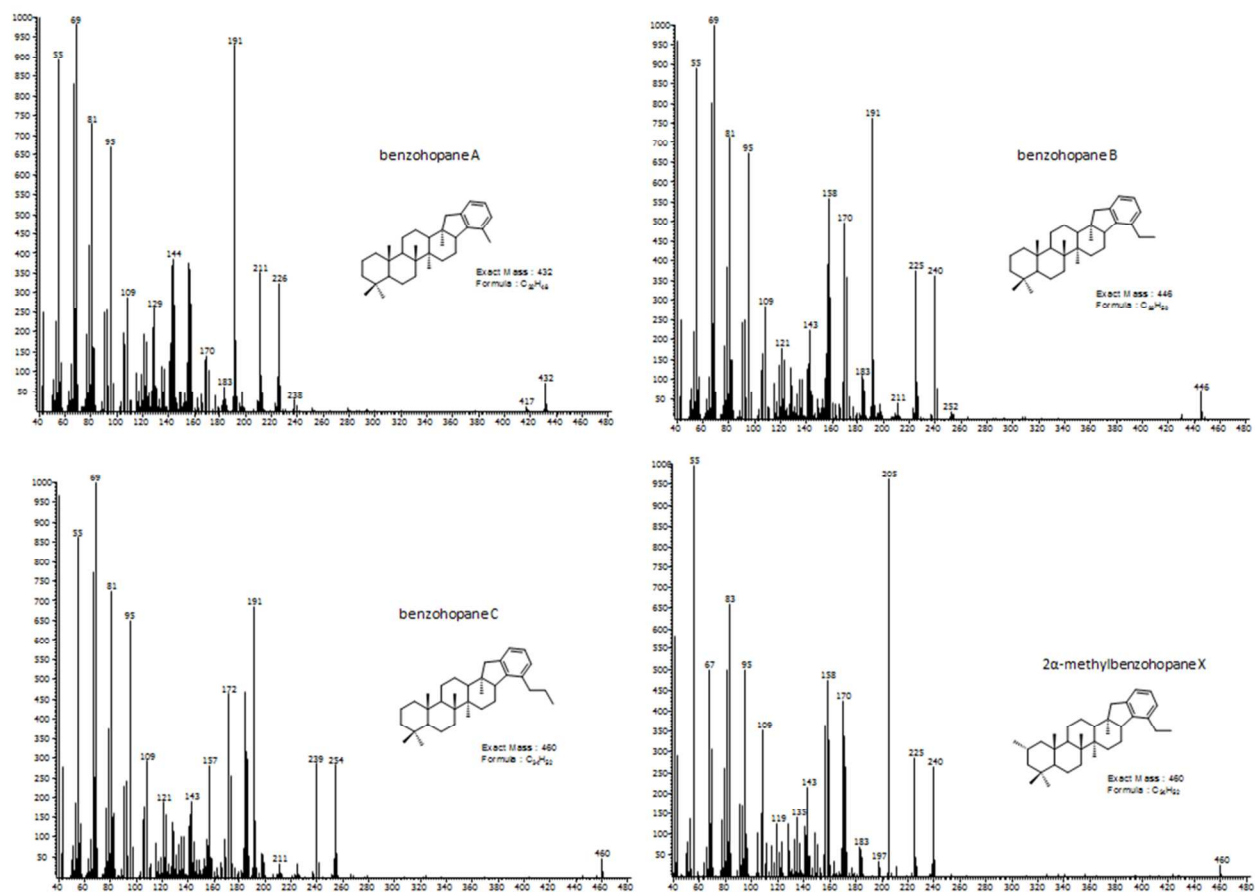

**Figure S4.** GC $\times$ GC-TOFMS chromatograms of benzohopanes and 2 $\alpha$ -methylbenzohopane.
